# Supplementary material
Source: ML conference proceedings conference paper supplement (https://openaccess.thecvf.com/content/ICCV2025/html/Shao_Memory-Efficient_Generative_Models_ICCV_2025_paper.html)
Supplement: Supplementary file 1 [file Shao_Memory-Efficient_Generative_Models_ICCV_2025_supplemental.pdf]

# Memory-Efficient Generative Models via Product Quantization

## Supplementary Material

### 1. Calculation of codebook compression

In Section 3.2 of the main paper, we define the compressed codebook size as  $N' = \frac{mn}{16d^2}$  and claim that, after compression, the codebook size is at most one-fourth the size of the quantized weights. To substantiate this claim, we perform calculations using a specific example rather than relying solely on theoretical analysis.

We consider a linear layer from the AdaLN module, with dimensions  $6912 \times 1152$ . After grouping, where 4 numbers are combined into one group, the size is transformed into  $6912 \times 288 \times 4$ , with each value stored in FP32 (32 bits per number). Following compression, the weights are reduced to  $6912 \times 288 \times 1$ , where each value is stored as Int8 (8 bits per number). This results in a total of *15,925,248 bits*.

For the compressed codebook,  $N'$  is calculated to be *31,104*. The size of the compressed codebook is  $31,104 \times 4$ , with each value stored in FP16 (16 bits per number), resulting in a total of *1,990,656 bits*. Additionally, the projection matrix from the original codebook to the compressed codebook has dimensions  $288 \times 256 \times 1$ , with each value stored in Int16 (16 bits per number), amounting to *1,179,648 bits*. In total, the size of the compressed codebook and the projection matrix is less than one-fourth of the size of the compressed weights, thereby validating our claim.

## 2. Experiments

### 2.1. Experiment details

**Class conditional generation.** The original DiT-XL/2 model checkpoint is provided in the DiT repository. The quantized models are evaluated on the ImageNet validation set using ADM’s evaluation suite. Specifically, we use pre-computed sample batches from ImageNet as a reference. These reference batches include pre-computed statistics over the entire dataset and 10,000 images for calculating precision and recall.

For compression stage, we adopt a stochastic relaxation of k-means with decreasing noise during the process. During fine-tuning, we set the weight decay to 0 and the class dropout probability to 0.1, which means the image labels are randomly dropped during training for better unconditional generation and classifier-free guidance.

Our code is built upon the repositories of DiT [5] and PQF [4], where DiT provides the evaluation and training framework, and PQF offers a basic implementation of VQ. The PQ implementation references the approach for CNNs from [7]. Calibration is conducted using the ImageNet dataset [1]. We sincerely appreciate the contributions of the

open-source community. The LDM code for both training and validation is based on the LDM repository [6], while the PQ for convolution follows the VQ for CNN implementation from [4].

**Text-to-Image Generation.** The T2I model code is built on diffusers [8], with model checkpoints sourced from Hugging Face. The evaluation toolkit is developed based on GenEval [2] and T2I-CompBench [3].

### 2.2. More experiments and visualization

We present experimental results for a resolution of  $512 \times 512$ . Our compression method is implemented and compared against other approaches. For evaluation, we use a DDPM scheduler with 50, 100, and 250 timesteps, along with a default classifier-free guidance (CFG) scale of 1.5. The results are summarized in Table 1, where our method consistently outperforms others, demonstrating significant improvements across a wide range of metrics.

Additionally, we provide visualizations of generated images under 1-bit and 2-bit compression with varying timesteps. These results are illustrated in Figure 1.

Table 1. Performance comparison on ImageNet with resolution of  $512 \times 512$

| Timesteps | Bit-width | Method | Size ratio     | FID ↓ | sFID ↓ | IS ↑   | Precision ↑ |
|-----------|-----------|--------|----------------|-------|--------|--------|-------------|
| 100       | 32        | FP     | -              | 5.00  | 19.02  | 274.78 | 0.8149      |
|           | 2         | GPTQ   | $10.10 \times$ | 3.1e2 | 1.7e2  | 2.66   | 0.0179      |
|           | 2         | Q-DiT  | $10.23 \times$ | 3.8e2 | 2.2e2  | 1.25   | 0.0001      |
|           | 2         | VQ4DiT | $10.59 \times$ | 34.32 | 51.08  | 57.03  | 0.7929      |
|           | 2         | Ours   | $9.92 \times$  | 19.18 | 26.42  | 107.14 | 0.7636      |
| 50        | 32        | FP     | -              | 6.02  | 21.77  | 246.24 | 0.7812      |
|           | 2         | GPTQ   | $10.10 \times$ | 3.2e2 | 1.8e2  | 2.65   | 0.0170      |
|           | 2         | Q-DiT  | $10.23 \times$ | 3.8e2 | 2.2e2  | 1.24   | 0.0001      |
|           | 2         | VQ4DiT | $10.59 \times$ | 35.08 | 48.81  | 56.82  | 0.7744      |
|           | 2         | Ours   | $9.92 \times$  | 22.23 | 29.71  | 92.96  | 0.7694      |

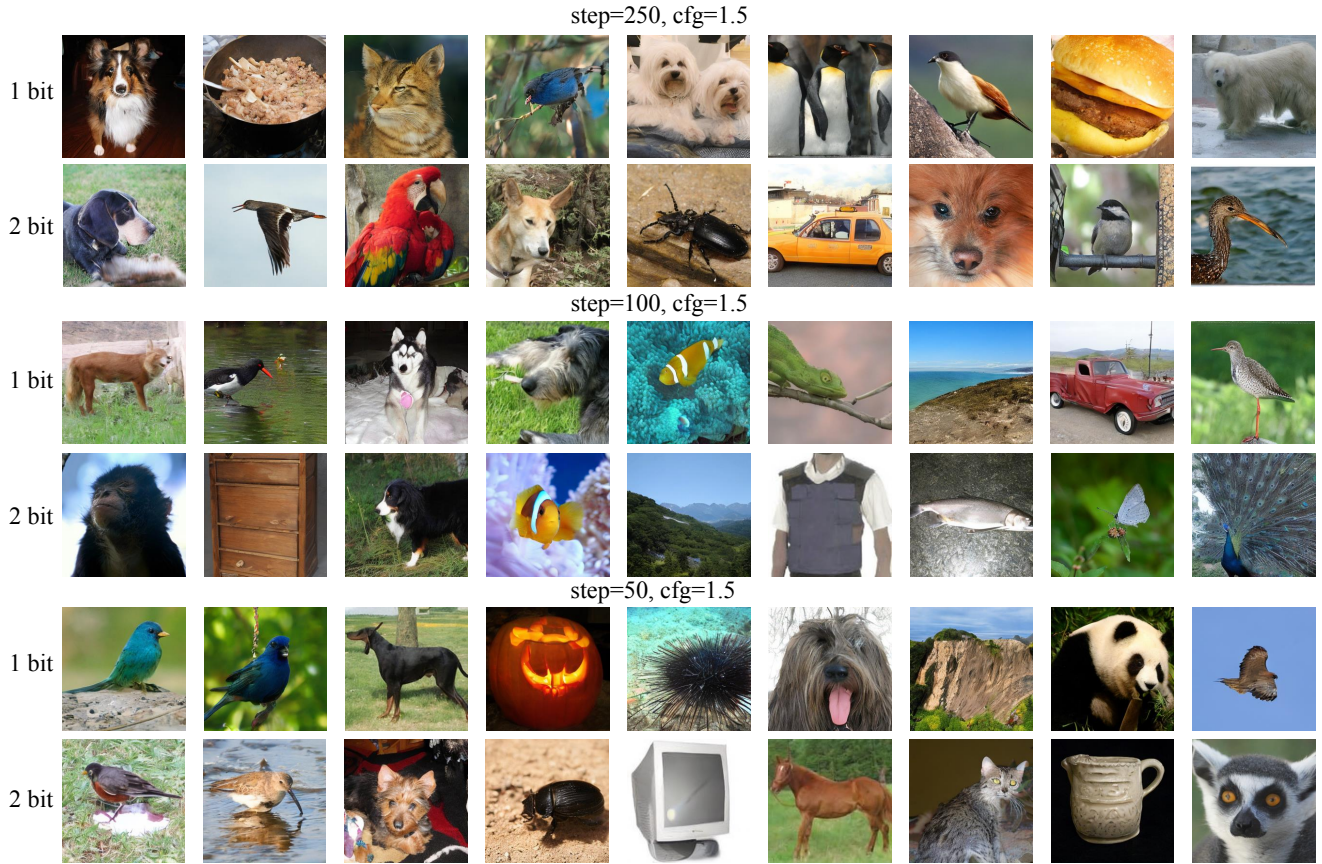

Figure 1. Visualization of generation results from the DPQ-compressed model.

## References

- [1] Jia Deng, Wei Dong, Richard Socher, Li-Jia Li, Kai Li, and Li Fei-Fei. Imagenet: A large-scale hierarchical image database. In *2009 IEEE conference on computer vision and pattern recognition*, pages 248–255. Ieee, 2009. 1
- [2] Dhruva Ghosh, Hannaneh Hajishirzi, and Ludwig Schmidt. Geneval: An object-focused framework for evaluating text-to-image alignment. *Advances in Neural Information Processing Systems*, 36:52132–52152, 2023. 1
- [3] Kaiyi Huang, Kaiyue Sun, Enze Xie, Zhenguo Li, and Xihui Liu. T2i-compbench: A comprehensive benchmark for open-world compositional text-to-image generation. *Advances in*

*Neural Information Processing Systems*, 36:78723–78747, 2023. 1

- [4] Julieta Martinez, Jashan Shewakramani, Ting Wei Liu, Ioan Andrei Bârsan, Wenyuan Zeng, and Raquel Urtasun. Permute, quantize, and fine-tune: Efficient compression of neural networks. In *Proceedings of the IEEE/CVF conference on computer vision and pattern recognition*, pages 15699–15708, 2021. 1
- [5] William Peebles and Saining Xie. Scalable diffusion models with transformers. In *Proceedings of the IEEE/CVF International Conference on Computer Vision*, pages 4195–4205, 2023. 1
- [6] Robin Rombach, Andreas Blattmann, Dominik Lorenz, Patrick Esser, and Björn Ommer. High-resolution image synthesis with latent diffusion models. In *Proceedings of the IEEE/CVF conference on computer vision and pattern recognition*, pages 10684–10695, 2022. 1
- [7] Pierre Stock, Armand Joulin, Rémi Gribonval, Benjamin Graham, and Hervé Jégou. And the bit goes down: Revisiting the quantization of neural networks. In *International Conference on Learning Representations*, 2020. 1
- [8] Patrick von Platen, Suraj Patil, Anton Lozhkov, Pedro Cuenca, Nathan Lambert, Kashif Rasul, Mishig Davaadorj, Dhruv Nair, Sayak Paul, William Berman, Yiyi Xu, Steven Liu, and Thomas Wolf. Diffusers: State-of-the-art diffusion models. <https://github.com/huggingface/diffusers>, 2022. 1
